# Supplementary material for: Genetic effects of fatty acid composition in muscle of Atlantic salmon
Source: Springer Nature journal article supplement (doi:10.1186/s12711-018-0394-x), 2018-05-02
Supplement: MOESM2 [file 12711_2018_394_MOESM2_ESM.pdf]

**16:0**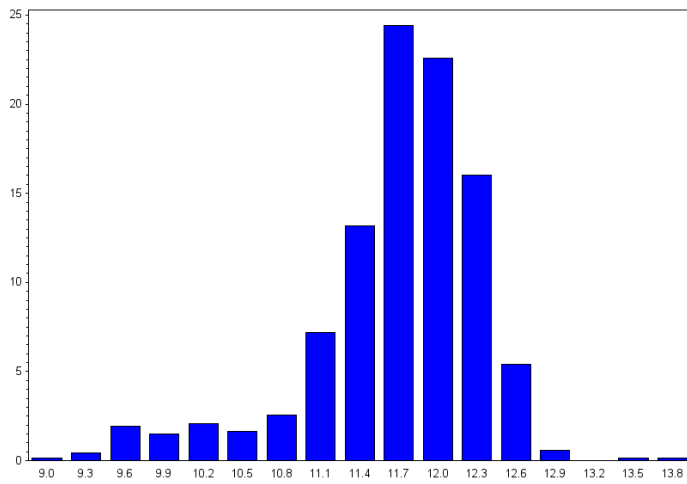**18:1n-9**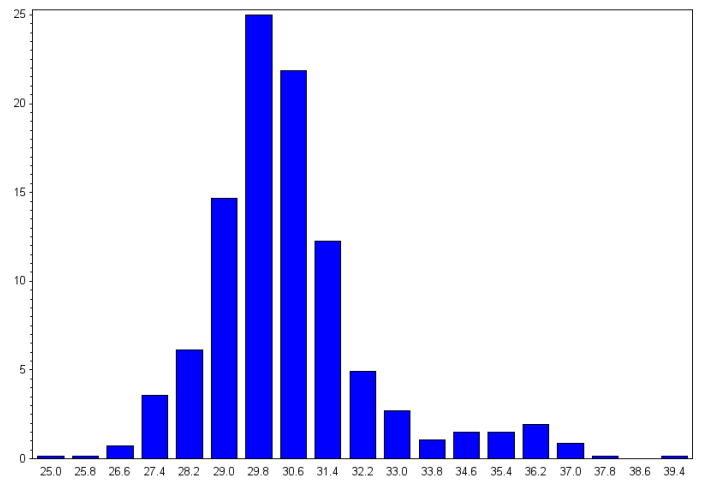**18:2n-6**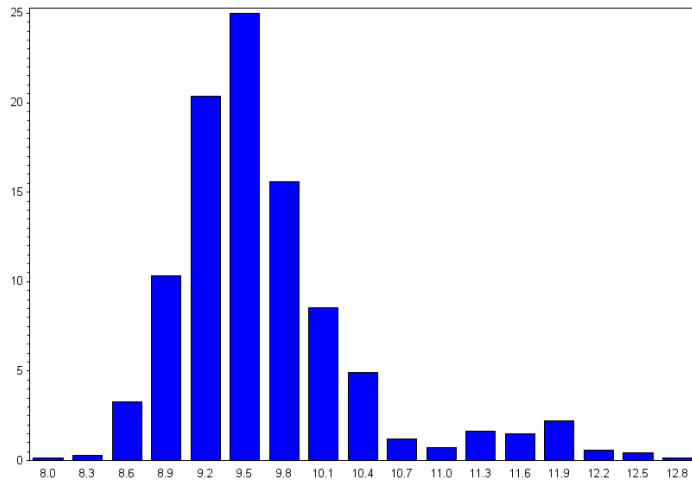**18:3n-3**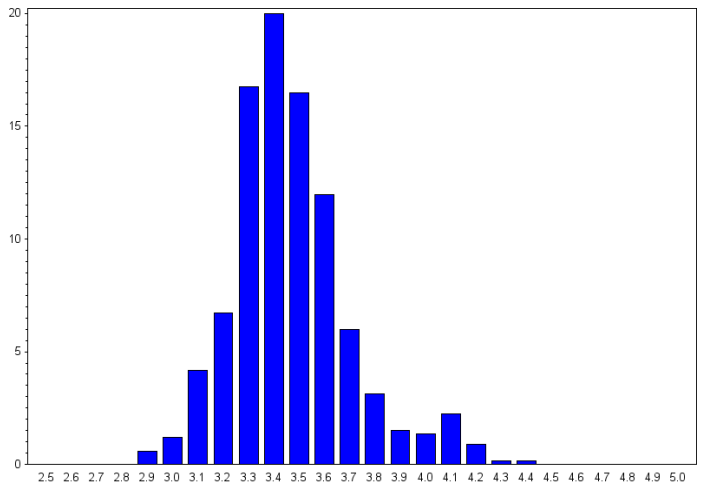**20:3n-3**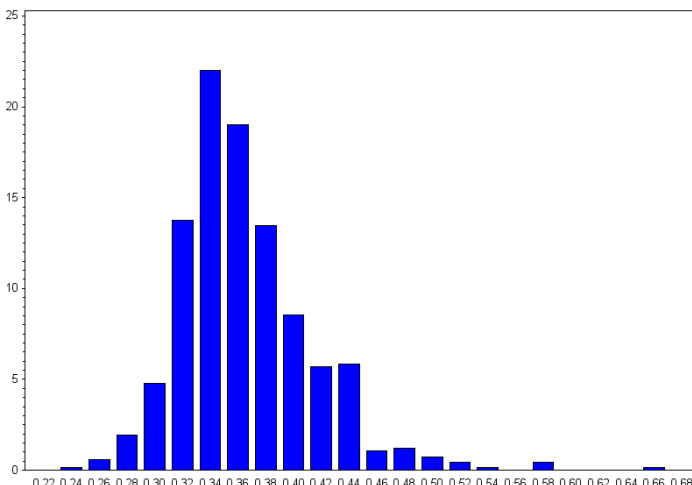**20:5n-3**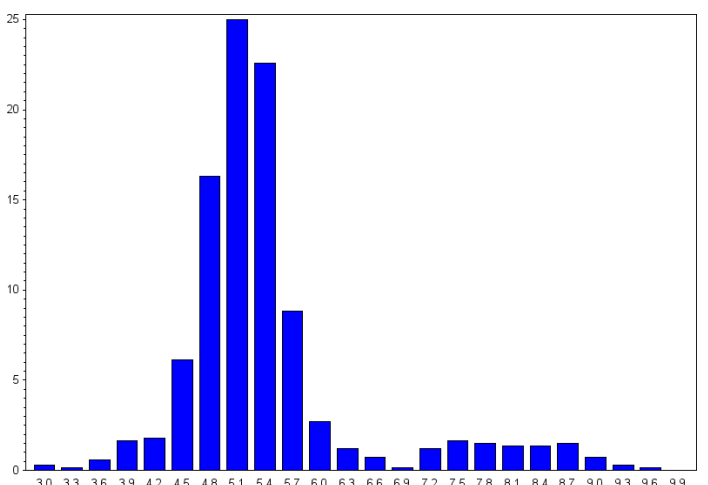**22:5n-3**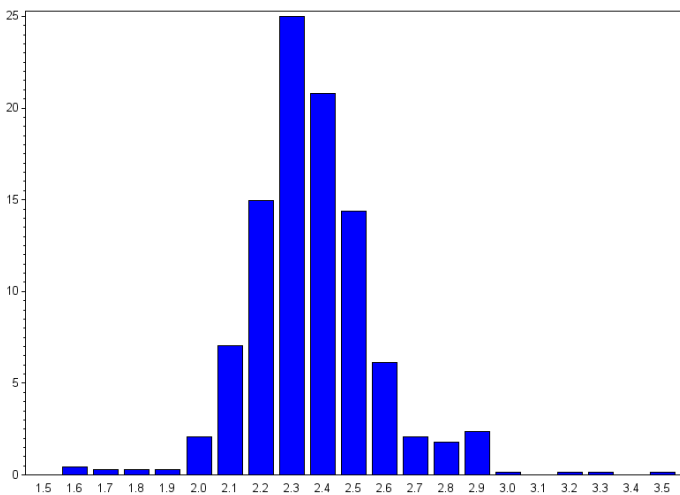**22:6n-3**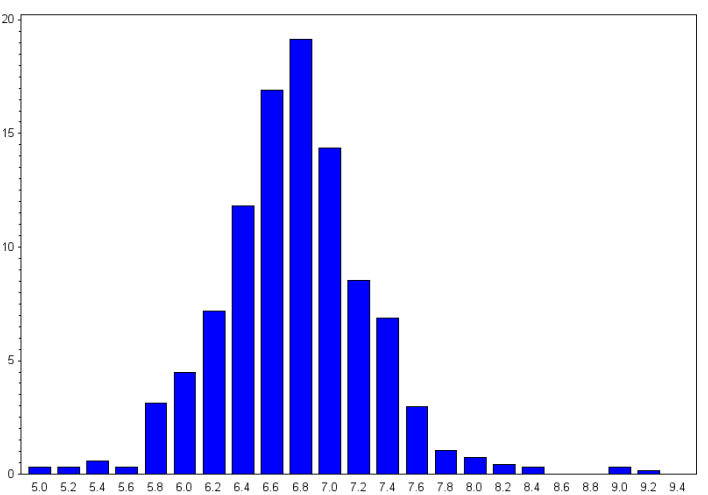

Percentage of observations

Percentage of total fatty acids
